# Supplementary material for: Rapid chemical analysis of bear bile: 5 minute separation and quantitation of bile acids using UHPLC–qTOF-MS
Source: Royal Society of Chemistry journal article supplement (doi:10.1039/c3ay41605d), 2013-10-30
Supplement: c3ay41605d.pdf [file c3ay41605d.pdf]

## Supporting Information

### Rapid chemical analysis of bear bile: a 5-minute separation and quantitation of bile acids using UHPLC/qTOF-MS

Xue Qiao <sup>a</sup>, Wei Song <sup>a</sup>, Xiong-hao Lin <sup>a</sup>, Qi Wang <sup>a</sup>, Tao Bo <sup>b</sup>, De-an Guo <sup>a</sup>, Junxiu Liu <sup>b,\*</sup> and Min Ye <sup>a,\*</sup>

#### Affiliation:

<sup>a</sup> *State Key Laboratory of Natural and Biomimetic Drugs, School of Pharmaceutical Sciences, Peking University, 38 Xueyuan Road, Beijing, China.*

<sup>b</sup> *Department of Otorhinolaryngology, Peking University Third Hospital, Beijing 100191, China.*

<sup>c</sup> *Agilent Technologies, Inc., 3 North Wangjing Road, Beijing 100102, China.*

\*. Corresponding authors. Tel./ fax: +86 10 82802024.

E-mail addresses: [yemin@bjmu.edu.cn](mailto:yemin@bjmu.edu.cn) (M. Ye); [liujunxiusanyuan@sina.com](mailto:liujunxiusanyuan@sina.com) (J. Liu).

## Table of contents

**Fig. 1S.** Extracted ion chromatograms of bear bile samples and blank matrix.

**Fig. 2S.** MS and MS/MS spectra of glycocholic acid and tauroursodeoxycholic acid.

**Fig. 3S.** Protonated ions of selected compounds (**1**, **4**, **6**, **8\***, **16\*** and **17\***) and their MS/MS fragments. [M-H]<sup>-</sup> ions of these compounds were marked with blue dots.

**Fig. 4S.** Minor MS/MS product ions of compounds **5** (A), **9\*** (B), **11** (C) and **13\*** (D).

**Table 1S.** Intraday and interday variation of the analytical method.

**Table 2S.** Recovery of bile acid analytes in quantitative analysis.

**Table 3S.** Stability of the analytes after ambient and refrigerated storage.

**Table 4S.** Occurrence of major and minor bile acids in 11 commercial bear bile samples.

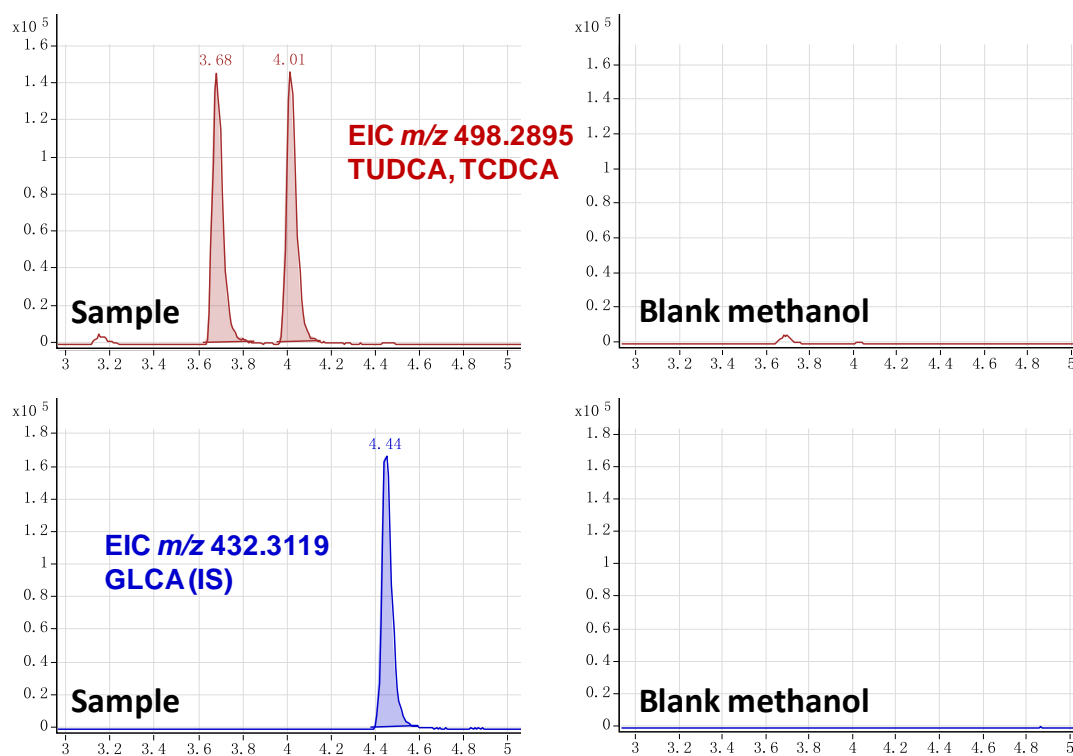

**Figure 1S.** Extracted ion chromatograms of bear bile samples and blank matrix.

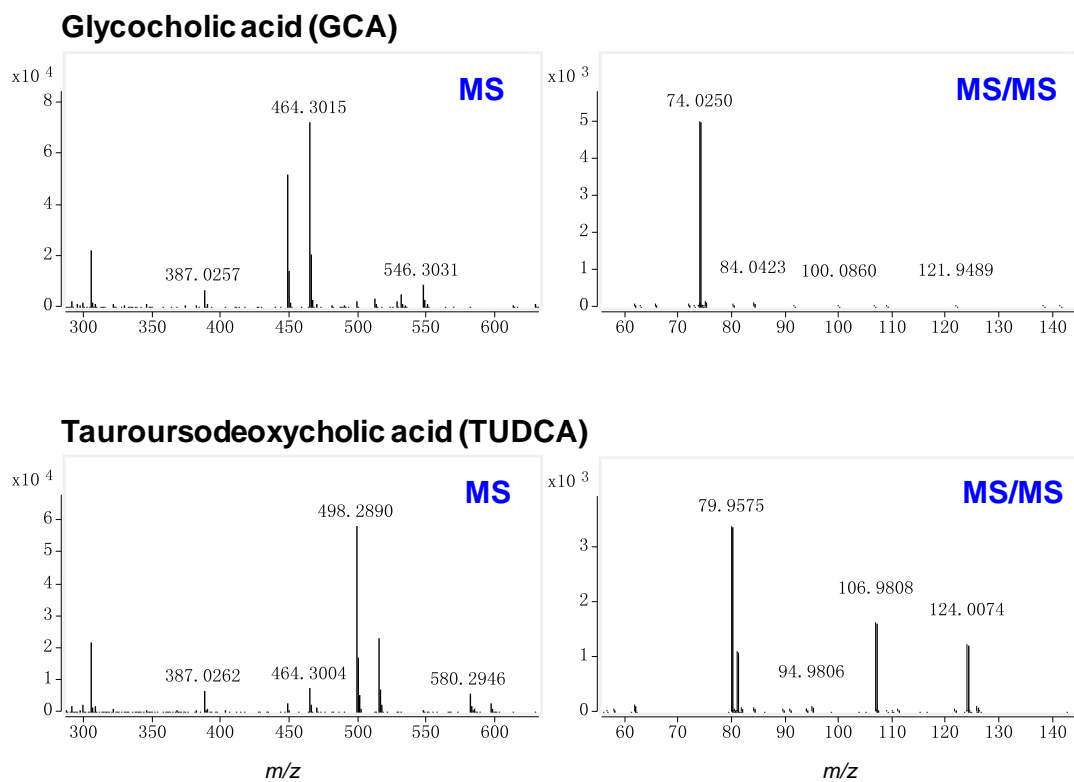

**Figure 2S.** MS and MS/MS spectra of glycocholic acid and tauroursodeoxycholic acid.

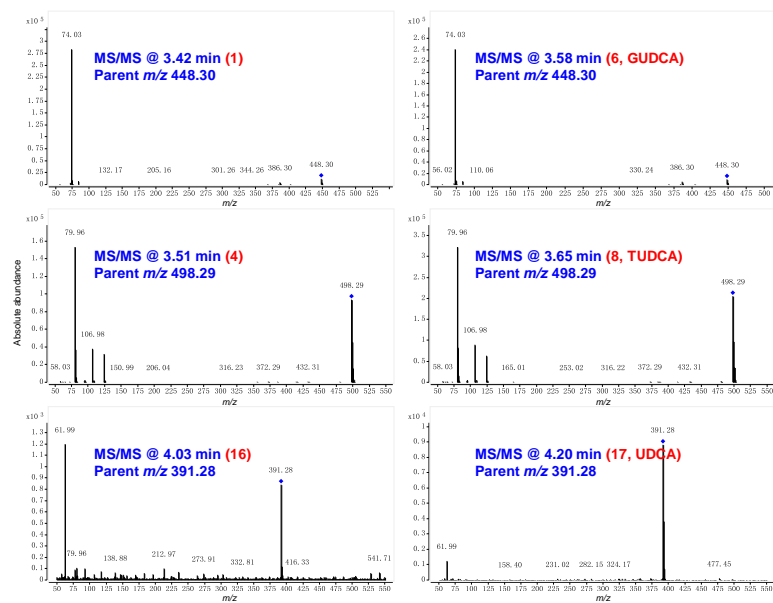

**Figure 3S.** Protonated ions of selected compounds (**1**, **4**, **6**, **8**, **16** and **17**) and their MS/MS fragments.  $[M-H]^-$  ions of these compounds were marked with blue dots.

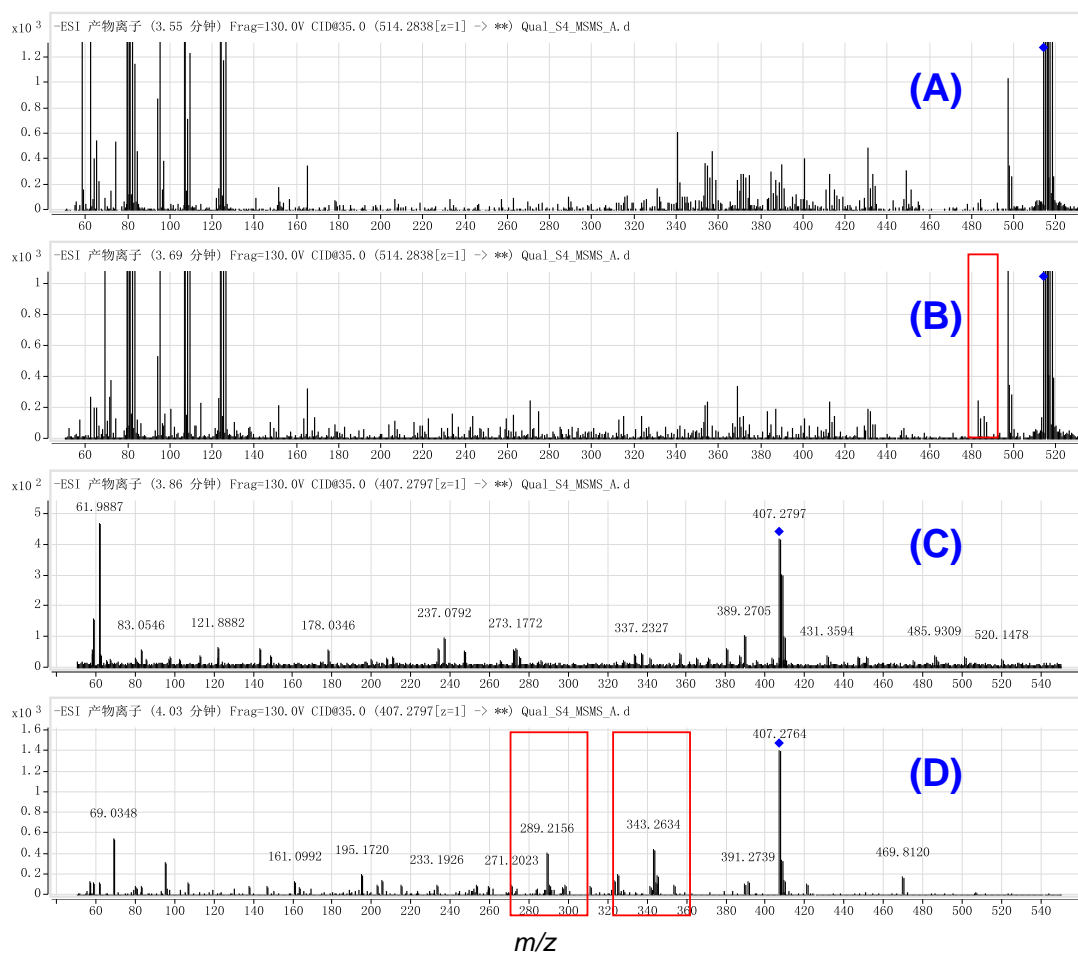

**Figure 4S.** Minor MS/MS product ions of compounds **5** (A), **9\*** (B), **11** (C) and **13\*** (D).

**Table 1S.** Intraday and interday variation of the analytical method.

| Analyte | Concentration<br>( $\mu\text{g/mL}$ ) | Intraday Precision |           | RE    | Interday Precision |           | RE    |
|---------|---------------------------------------|--------------------|-----------|-------|--------------------|-----------|-------|
|         |                                       | RSD%               | ( $n=6$ ) | %     | RSD%               | ( $n=3$ ) | %     |
| TUDCA   | LLOQ (0.08)                           | 1.45               |           | -3.53 | 1.87               |           | -2.58 |
|         | MQC (0.25)                            | 2.02               |           | 6.71  | 1.23               |           | 4.21  |
|         | HQC (0.75)                            | 1.59               |           | 1.08  | 1.95               |           | 2.51  |
| TCDCA   | LLOQ (0.08)                           | 5.35               |           | 4.64  | 2.32               |           | 0.54  |
|         | MQC (0.25)                            | 1.66               |           | -2.98 | 1.53               |           | -5.60 |
|         | HQC (0.75)                            | 0.74               |           | -7.39 | 1.12               |           | -7.73 |

Note: RSD, relative standard deviation; RE, Relative error (calculated by (measured concentration / nominal concentration - 1)  $\times$  100%).

**Table 2S.** Recovery of bile acid analytes in quantitative analysis.

| Analyte |      | Spiked ( $\mu\text{g/mL}$ ) | Found ( $\mu\text{g/mL}$ ) | Recovery (%) |
|---------|------|-----------------------------|----------------------------|--------------|
| TUDCA   | LLOQ | 0.0400                      | 0.0423                     | 105.75       |
|         | MQC  | 0.3750                      | 0.3542                     | 94.45        |
|         | HQC  | 3.7500                      | 3.7756                     | 100.68       |
| TCDCA   | LLOQ | 0.0400                      | 0.0381                     | 95.25        |
|         | MQC  | 0.3750                      | 0.3943                     | 105.15       |
|         | HQC  | 3.7500                      | 4.0045                     | 106.79       |

Note: Recovery (%) = concentration found / concentration spiked  $\times$  100%.



**Table 3S.** Stability of the analytes after ambient and refrigerated storage.

| Analyte | Nominated conc.<br>( $\mu\text{g/mL}$ ) | RE%<br>(Ambient 24 h) | RE%<br>(Ambient 36 h) | RE%<br>(-20 °C 48 h) |
|---------|-----------------------------------------|-----------------------|-----------------------|----------------------|
| TUDCA   | LLOQ (0.08)                             | 10.05                 | 3.42                  | 12.40                |
|         | MQC (0.25)                              | -2.25                 | -3.31                 | 7.59                 |
|         | HQC (0.75)                              | 1.20                  | 1.34                  | 3.59                 |
| TCDCA   | LLOQ (0.08)                             | -3.34                 | -4.60                 | 2.76                 |
|         | MQC (0.25)                              | -3.07                 | -1.96                 | -13.30               |
|         | HQC (0.75)                              | -2.23                 | -0.77                 | 1.39                 |

Note: RE, Relative error (calculated by (measured concentration / nominal concentration - 1)  $\times$  100%).

**Table 4S.** Occurrence of major and minor bile acids in 11 commercial bear bile samples.

| Sample | Compound No. |   |   |   |   |    |   |    |    |    |    |     |     |     |    |    |     |    |     |    |     |
|--------|--------------|---|---|---|---|----|---|----|----|----|----|-----|-----|-----|----|----|-----|----|-----|----|-----|
|        | 1            | 2 | 3 | 4 | 5 | 6* | 7 | 8* | 9* | 10 | 11 | 12* | 13* | 14* | 15 | 16 | 17* | 18 | 19* | 20 | 21* |
| 1      | -            | - | + | - | - | -  | + | +  | +  | +  | -  | -   | -   | +   | +  | -  | -   | +  | +   | -  | -   |
| 2      | -            | - | - | - | - | -  | - | +  | +  | +  | +  | -   | +   | +   | +  | -  | +   | +  | +   | +  | +   |
| 3      | -            | - | - | - | - | -  | - | +  | +  | +  | +  | -   | +   | +   | +  | -  | +   | +  | +   | +  | +   |
| 4      | +            | + | - | + | + | +  | - | +  | +  | +  | +  | +   | +   | +   | +  | +  | +   | +  | +   | +  | +   |
| 5      | -            | - | + | - | - | -  | + | +  | +  | +  | -  | -   | +   | +   | +  | -  | -   | +  | +   | +  | +   |
| 6      | -            | - | + | - | - | -  | + | +  | +  | +  | -  | -   | -   | +   | +  | -  | -   | +  | +   | +  | -   |
| 7      | -            | - | - | - | - | -  | - | +  | +  | +  | -  | -   | -   | +   | +  | -  | -   | +  | +   | +  | -   |
| 8      | -            | - | + | - | - | -  | + | +  | +  | +  | -  | -   | -   | +   | +  | -  | -   | +  | +   | +  | -   |
| 9      | -            | - | + | - | - | -  | - | +  | +  | +  | +  | -   | +   | +   | +  | +  | +   | +  | +   | +  | +   |
| 10     | -            | - | + | - | - | -  | - | +  | +  | +  | +  | -   | +   | +   | +  | -  | -   | +  | +   | +  | +   |
| 11     | -            | - | - | - | - | -  | - | +  | +  | +  | -  | -   | -   | +   | +  | -  | -   | -  | -   | +  | -   |

Note: Sample number was in accordance with Table 1; +, detected; -, not detected.
